# Supplementary material for: Maternal voluntary wheel running modulates glucose homeostasis, the gut microbiota and its derived fecal metabolites in offspring
Source: PubMed Central journal article supplement (PMC10412464; doi:10.1042/cs20230372), 2023-08-09
Supplement: CS-2023-0372_supp.pdf [file CS-2023-0372_supp.pdf]

## Supplementary Figure

**Fig. S1. Body weight, and food intake of dams, and body weight of offspring.** (A) Maternal body weight at baseline and prepregnancy. (B) Maternal energy intake. (C) Body weight of offspring from 1 week of age to 3 weeks of age. n=11 litters/group, one male offspring per litter. \*P < 0.05 , HF vs. NC group.

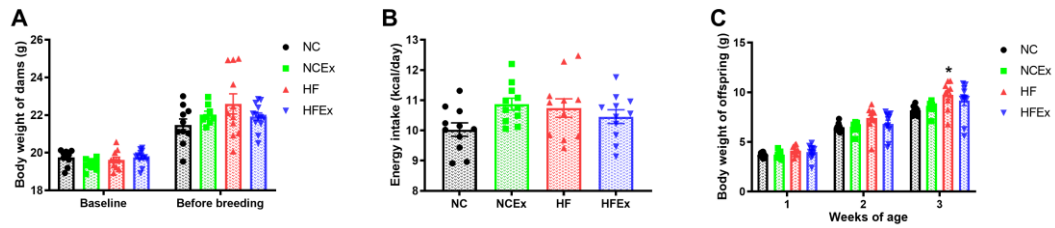

**Fig. S2. Maternal exercise altered structures and composition of gut microbiota in offspring. (A) Relative abundance of the bacterial population at the phylum level of each mouse. (B) Relative abundance of the bacterial population at the genus level of each mouse.**

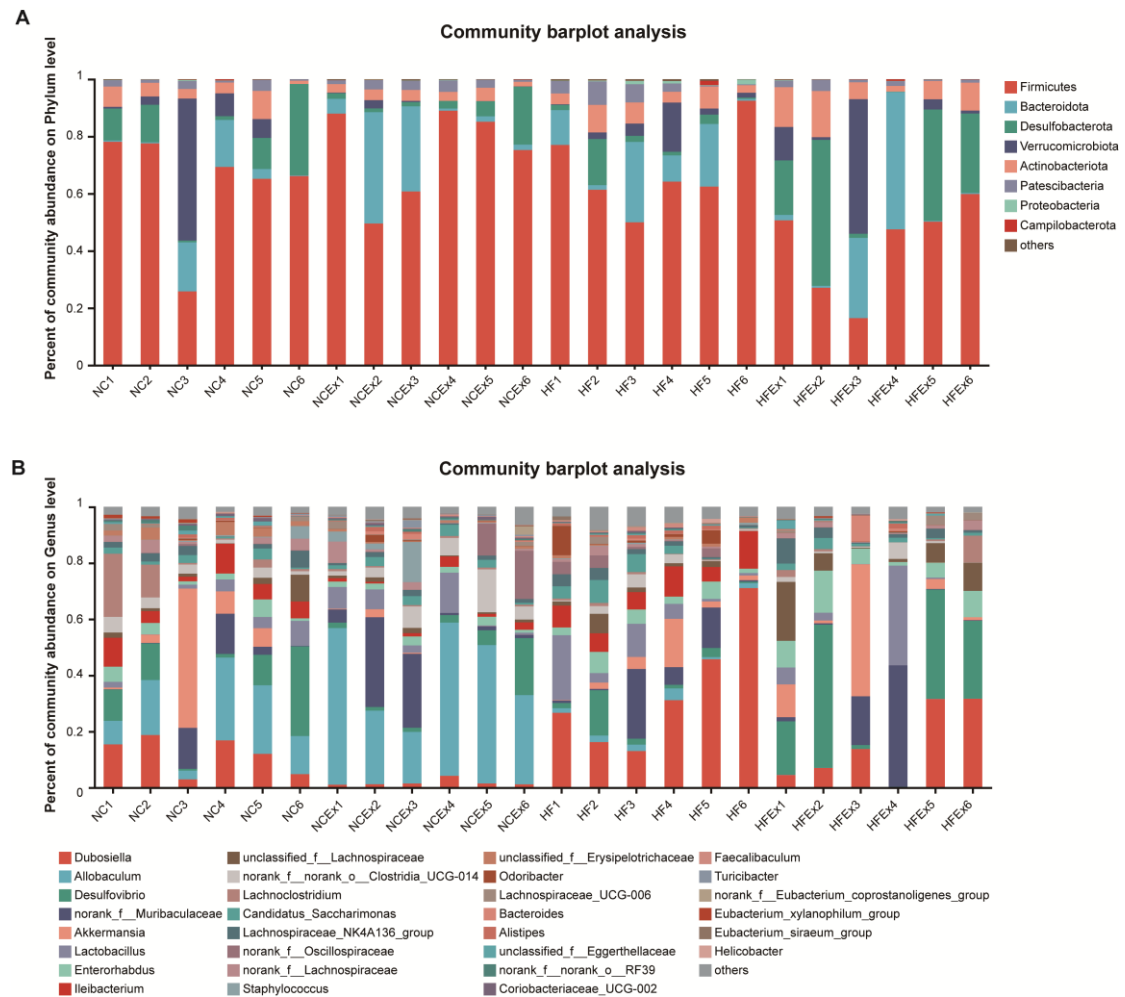

## Supplementary Tables

Table S1. Primer sequences of genes.

| Genes                           | Forward                  | Reverse                  |
|---------------------------------|--------------------------|--------------------------|
| <b>G6Pc</b>                     | CGACTCGCTATCTCCAAGTGA    | GTTGAACCAGTCTCCGACCA     |
| <b>FBP1</b>                     | CACCGCGATCAAAGCCATCT     | AGGTAGCGTAGGACGACTTCA    |
| <b>FBP2</b>                     | ACCCTGACCCGTTACGTTATG    | ACATTCACGCTCCCCGAAATC    |
| <b>PCx</b>                      | CTGAAGTTCCAAACAGTTTCGAGG | CGCACGAAACACTCGGATG      |
| <b>PCK1</b>                     | CTGCATAACGGTCTGGACTTC    | CAGCAACTGCCCCGTACTION    |
| <b>Mut</b>                      | TTTTTGCTATCGCCCCATTACC   | CCTCTGGGTTTTTGCCTTTCAG   |
| <b><math>\beta</math>-actin</b> | TATTGGCAACGAGCGGTTCC     | GGCATAGAGGTCTTTACGGATGTC |

G6P, glucose 6-phosphate; FBP1, fructose-1,6-bisphosphatase 1; FBP2, fructose-1,6-bisphosphatase 2; Pcx, pyruvate carboxylase; PCK1, phosphoenolpyruvate carboxykinase 1; Mut, methylmalonyl-coA mutase.

**Table S2. Alpha diversity of gut microbiota community in offspring.**

| <b>Index</b>   | <b>NC</b>    | <b>NCEx</b>  | <b>HF</b>    | <b>HFEx</b>  | <b>P value<br/>(HF vs. NC)</b> | <b>P value<br/>(HFEx vs. HF)</b> |
|----------------|--------------|--------------|--------------|--------------|--------------------------------|----------------------------------|
| <b>Shannon</b> | 3.04±0.14    | 2.88±0.78    | 3.00±0.87    | 2.70±0.60    | 0.99                           | 0.86                             |
| <b>Simpson</b> | 0.13±0.06    | 0.20±0.12    | 0.18±0.18    | 0.19±0.09    | 0.89                           | 0.99                             |
| <b>Ace</b>     | 348.60±31.27 | 344.40±28.60 | 365.90±49.89 | 320.80±33.69 | 0.85                           | 0.18                             |
| <b>Chao</b>    | 340.60±33.22 | 341.60±28.03 | 362.40±51.92 | 327.10±36.70 | 0.76                           | 0.41                             |

**Table S3. Differential species at the genus level among the four groups.**

| <b>Species name</b>                                       | <b>NC-Mean<br/>(%)</b> | <b>NCEx-Mean<br/>(%)</b> | <b>HF-Mean<br/>(%)</b> | <b>HFEx-Mean<br/>(%)</b> | <b>P value</b> |
|-----------------------------------------------------------|------------------------|--------------------------|------------------------|--------------------------|----------------|
| g__Flavobacterium                                         | 0.000                  | 0.000                    | 0.014                  | 0.000                    | 0.000          |
| g__Allorhizobium-Neorhizobium-Pararhizobium-<br>Rhizobium | 0.000                  | 0.000                    | 0.197                  | 0.000                    | 0.000          |
| g__Roseomonas                                             | 0.000                  | 0.000                    | 0.015                  | 0.000                    | 0.000          |
| g__Allobaculum                                            | 16.430                 | 39.360                   | 2.172                  | 0.061                    | 0.000          |
| g__Turicibacter                                           | 0.230                  | 0.807                    | 0.000                  | 0.001                    | 0.000          |
| g__Ileibacterium                                          | 6.374                  | 1.733                    | 8.314                  | 0.012                    | 0.000          |
| g__Cyanobium_PCC-6307                                     | 0.000                  | 0.000                    | 0.007                  | 0.000                    | 0.000          |
| g__Bifidobacterium                                        | 0.001                  | 0.012                    | 0.245                  | 0.031                    | 0.001          |
| g__Faecalibaculum                                         | 0.113                  | 0.391                    | 0.667                  | 0.031                    | 0.001          |
| g__unclassified_f__Erysipelotrichaceae                    | 2.665                  | 0.598                    | 0.887                  | 0.010                    | 0.001          |
| g__norank_f__T34                                          | 0.000                  | 0.000                    | 0.012                  | 0.001                    | 0.001          |
| g__Limnohabitans                                          | 0.000                  | 0.000                    | 0.005                  | 0.001                    | 0.002          |
| g__norank_f__Candidatus_Hepaticicola                      | 0.000                  | 0.000                    | 0.018                  | 0.000                    | 0.003          |
| g__Dubosiella                                             | 11.750                 | 1.716                    | 33.940                 | 14.720                   | 0.005          |
| g__Prevotellaceae_NK3B31_group                            | 0.018                  | 0.001                    | 0.009                  | 0.001                    | 0.010          |

---

|                                               |       |       |       |       |       |
|-----------------------------------------------|-------|-------|-------|-------|-------|
| g__Eubacterium_ventriosum_group               | 0.017 | 0.101 | 0.000 | 0.002 | 0.012 |
| g__Coriobacteriaceae_UCG-002                  | 0.541 | 0.539 | 0.247 | 0.084 | 0.013 |
| g__unclassified_p__Firmicutes                 | 0.007 | 0.039 | 0.001 | 0.000 | 0.013 |
| g__Pluralibacter                              | 0.000 | 0.001 | 0.007 | 0.000 | 0.013 |
| g__Herbaspirillum                             | 0.000 | 0.001 | 0.004 | 0.000 | 0.013 |
| g__Anaerofustis                               | 0.107 | 0.017 | 0.009 | 0.020 | 0.018 |
| g__NK4A214_group                              | 0.023 | 0.016 | 0.087 | 0.003 | 0.019 |
| g__Anaerovorax                                | 0.003 | 0.000 | 0.020 | 0.000 | 0.019 |
| g__Aeromonas                                  | 0.000 | 0.000 | 0.207 | 0.000 | 0.020 |
| g__Fournierella                               | 0.000 | 0.000 | 0.012 | 0.000 | 0.020 |
| g__Staphylococcus                             | 0.925 | 3.385 | 0.305 | 0.047 | 0.028 |
| g__Burkholderia-Caballeronia-Paraburkholderia | 0.002 | 0.007 | 0.033 | 0.008 | 0.028 |
| g__Clostridium_sensu_stricto_1                | 0.117 | 0.372 | 0.006 | 0.001 | 0.032 |
| g__Eubacterium_xylanophilum_group             | 0.636 | 0.033 | 0.009 | 0.156 | 0.032 |
| g__unclassified_c__Bacilli                    | 0.102 | 0.087 | 0.076 | 0.003 | 0.035 |
| g__norank_f__norank_o__Clostridia_UCG-014     | 3.150 | 6.486 | 1.992 | 1.572 | 0.038 |
| g__Christensenellaceae_R-7_group              | 0.320 | 0.031 | 0.168 | 0.060 | 0.038 |
| g__norank_f__norank_o__norank_c__Clostridia   | 0.002 | 0.003 | 0.045 | 0.003 | 0.049 |

---

**Table S4. Functional predictions of bacterial communities by KEGG pathway database in offspring.**

|                     | <b>Name</b>                                 | <b>P value</b> | <b>NC-<br/>Mean<br/>(%)</b> | <b>NCEx-<br/>Mean (%)</b> | <b>HF-<br/>Mean<br/>(%)</b> | <b>HFEx-<br/>Mean<br/>(%)</b> |
|---------------------|---------------------------------------------|----------------|-----------------------------|---------------------------|-----------------------------|-------------------------------|
| <b>KEGG-level 1</b> | Metabolism                                  | 0.964          | 76.590                      | 76.710                    | 76.520                      | 76.850                        |
|                     | Genetic Information Processing              | 0.132          | 8.502                       | 8.509                     | 8.774                       | 8.224                         |
|                     | Environmental Information Processing        | 0.867          | 6.267                       | 6.261                     | 6.202                       | 6.293                         |
|                     | Cellular Processes                          | 0.774          | 3.870                       | 3.810                     | 3.648                       | 3.942                         |
|                     | Human Diseases                              | 0.337          | 3.125                       | 3.089                     | 3.204                       | 3.067                         |
|                     | Organismal Systems                          | 0.704          | 1.643                       | 1.621                     | 1.649                       | 1.625                         |
| <b>KEGG-level 2</b> | Carbohydrate metabolism                     | 0.044          | 10.620                      | 11.080                    | 10.780                      | 10.170                        |
|                     | Amino acid metabolism                       | 0.963          | 6.997                       | 7.009                     | 7.017                       | 6.937                         |
|                     | Energy metabolism                           | 0.138          | 4.205                       | 4.147                     | 4.185                       | 4.423                         |
|                     | Metabolism of cofactors and vitamins        | 0.012          | 3.726                       | 3.557                     | 3.475                       | 4.003                         |
|                     | Lipid metabolism                            | 0.650          | 1.731                       | 1.810                     | 1.728                       | 1.775                         |
|                     | Biosynthesis of other secondary metabolites | 0.082          | 1.551                       | 1.480                     | 1.557                       | 1.568                         |
|                     | Glycan biosynthesis and metabolism          | 0.609          | 1.557                       | 1.362                     | 1.533                       | 1.641                         |

|                     |                                            |       |       |       |       |       |
|---------------------|--------------------------------------------|-------|-------|-------|-------|-------|
|                     | Metabolism of other amino acids            | 0.311 | 1.182 | 1.250 | 1.242 | 1.248 |
|                     | Metabolism of terpenoids and polyketides   | 0.005 | 1.043 | 1.069 | 1.089 | 0.987 |
|                     | Endocrine system                           | 0.682 | 0.605 | 0.630 | 0.625 | 0.575 |
|                     | Transport and catabolism                   | 0.726 | 0.241 | 0.193 | 0.216 | 0.286 |
|                     | Endocrine and metabolic disease            | 0.051 | 0.232 | 0.242 | 0.256 | 0.204 |
|                     | Cancer: specific types                     | 0.021 | 0.055 | 0.058 | 0.070 | 0.046 |
|                     | Infectious disease: viral                  | 0.005 | 0.054 | 0.056 | 0.069 | 0.044 |
|                     | Circulatory system                         | 0.024 | 0.000 | 0.000 | 0.003 | 0.000 |
|                     | Signaling molecules and interaction        | 0.637 | 0.000 | 0.000 | 0.000 | 0.000 |
| <b>KEGG-level 3</b> | Fatty acid degradation                     | 0.001 | 0.002 | 0.016 | 0.012 | 0.001 |
|                     | Synthesis and degradation of ketone bodies | 0.001 | 0.034 | 0.072 | 0.056 | 0.025 |
|                     | Photosynthesis - antenna proteins          | 0.002 | 0.001 | 0.010 | 0.005 | 0.000 |
|                     | Tetracycline biosynthesis                  | 0.002 | 0.001 | 0.001 | 0.006 | 0.001 |
|                     | Valine, leucine and isoleucine degradation | 0.002 | 0.020 | 0.030 | 0.030 | 0.011 |
|                     | Geraniol degradation                       | 0.003 | 0.000 | 0.000 | 0.000 | 0.000 |
|                     | Lysine degradation                         | 0.003 | 0.000 | 0.000 | 0.000 | 0.000 |



|                                                     |       |       |       |       |       |
|-----------------------------------------------------|-------|-------|-------|-------|-------|
| Chlorocyclohexane and chlorobenzene degradation     | 0.003 | 0.000 | 0.000 | 0.000 | 0.000 |
| Furfural degradation                                | 0.004 | 0.000 | 0.000 | 0.001 | 0.000 |
| Tryptophan metabolism                               | 0.005 | 0.016 | 0.022 | 0.023 | 0.011 |
| Phenylalanine, tyrosine and tryptophan biosynthesis | 0.006 | 0.000 | 0.000 | 0.002 | 0.000 |
| Staurosporine biosynthesis                          | 0.007 | 0.144 | 0.199 | 0.167 | 0.155 |
| Starch and sucrose metabolism                       | 0.007 | 0.001 | 0.000 | 0.002 | 0.002 |
| Lipoarabinomannan (LAM) biosynthesis                | 0.008 | 0.125 | 0.206 | 0.162 | 0.118 |
| Arachidonic acid metabolism                         | 0.008 | 0.296 | 0.277 | 0.264 | 0.351 |
| Chloroalkane and chloroalkene degradation           | 0.008 | 0.000 | 0.000 | 0.001 | 0.000 |
| C5-Branched dibasic acid metabolism                 | 0.009 | 0.015 | 0.021 | 0.024 | 0.008 |
| Carbon fixation in photosynthetic organisms         | 0.009 | 0.015 | 0.021 | 0.024 | 0.008 |
| Biotin metabolism                                   | 0.009 | 0.000 | 0.001 | 0.006 | 0.000 |
| Retinol metabolism                                  | 0.010 | 0.000 | 0.000 | 0.000 | 0.000 |
| Terpenoid backbone biosynthesis                     | 0.011 | 0.053 | 0.055 | 0.059 | 0.043 |
| Indole alkaloid biosynthesis                        | 0.011 | 0.053 | 0.055 | 0.059 | 0.043 |

|                                               |       |       |       |       |       |
|-----------------------------------------------|-------|-------|-------|-------|-------|
| Sesquiterpenoid and triterpenoid biosynthesis | 0.012 | 0.025 | 0.033 | 0.026 | 0.016 |
| Sulfur metabolism                             | 0.014 | 0.025 | 0.034 | 0.029 | 0.016 |
| Isoflavonoid biosynthesis                     | 0.014 | 0.000 | 0.000 | 0.001 | 0.000 |
| Flavone and flavonol biosynthesis             | 0.014 | 0.112 | 0.149 | 0.121 | 0.106 |
| Isoquinoline alkaloid biosynthesis            | 0.015 | 0.000 | 0.000 | 0.000 | 0.000 |
| Betalain biosynthesis                         | 0.015 | 0.000 | 0.000 | 0.004 | 0.000 |
| Drug metabolism - cytochrome P450             | 0.015 | 0.000 | 0.000 | 0.004 | 0.000 |
| Steroid degradation                           | 0.016 | 0.000 | 0.000 | 0.001 | 0.000 |
| Biosynthesis of vancomycin group antibiotics  | 0.016 | 0.000 | 0.000 | 0.001 | 0.000 |
| Biosynthesis of type II polyketide products   | 0.016 | 0.000 | 0.000 | 0.001 | 0.000 |
| Basal transcription factors                   | 0.016 | 0.000 | 0.000 | 0.001 | 0.000 |
| Spliceosome                                   | 0.016 | 0.000 | 0.000 | 0.001 | 0.000 |
| Bacterial secretion system                    | 0.016 | 0.000 | 0.000 | 0.001 | 0.000 |
| Homologous recombination                      | 0.016 | 0.000 | 0.000 | 0.001 | 0.000 |
| Calcium signaling pathway                     | 0.016 | 0.000 | 0.000 | 0.001 | 0.000 |
| p53 signaling pathway                         | 0.016 | 0.000 | 0.000 | 0.001 | 0.000 |
| Peroxisome                                    | 0.016 | 0.000 | 0.000 | 0.001 | 0.000 |

|                                           |       |       |       |       |       |
|-------------------------------------------|-------|-------|-------|-------|-------|
| Apoptosis - multiple species              | 0.016 | 0.000 | 0.000 | 0.001 | 0.000 |
| Cardiac muscle contraction                | 0.016 | 0.000 | 0.000 | 0.001 | 0.000 |
| Dorso-ventral axis formation              | 0.016 | 0.000 | 0.000 | 0.001 | 0.000 |
| Platelet activation                       | 0.016 | 0.000 | 0.000 | 0.001 | 0.000 |
| NOD-like receptor signaling pathway       | 0.018 | 0.000 | 0.000 | 0.000 | 0.000 |
| RIG-I-like receptor signaling pathway     | 0.018 | 0.000 | 0.000 | 0.000 | 0.000 |
| Retrograde endocannabinoid signaling      | 0.019 | 0.003 | 0.002 | 0.008 | 0.004 |
| Type II diabetes mellitus                 | 0.021 | 0.493 | 0.526 | 0.516 | 0.465 |
| Cushing syndrome                          | 0.022 | 0.000 | 0.000 | 0.000 | 0.000 |
| Type I diabetes mellitus                  | 0.022 | 0.272 | 0.246 | 0.246 | 0.273 |
| Parkinson disease                         | 0.023 | 0.055 | 0.058 | 0.068 | 0.046 |
| Huntington disease                        | 0.024 | 0.003 | 0.013 | 0.009 | 0.003 |
| Bacterial invasion of epithelial cells    | 0.024 | 0.000 | 0.000 | 0.003 | 0.000 |
| Pertussis                                 | 0.024 | 0.026 | 0.016 | 0.017 | 0.049 |
| Yersinia infection                        | 0.025 | 0.000 | 0.000 | 0.000 | 0.000 |
| Chagas disease (American trypanosomiasis) | 0.025 | 0.000 | 0.000 | 0.000 | 0.000 |
| African trypanosomiasis                   | 0.026 | 0.714 | 0.850 | 0.871 | 0.400 |

|                                                 |       |       |       |       |       |
|-------------------------------------------------|-------|-------|-------|-------|-------|
| Hepatitis C                                     | 0.026 | 0.588 | 0.596 | 0.607 | 0.541 |
| Hepatitis B                                     | 0.027 | 0.000 | 0.000 | 0.000 | 0.000 |
| Measles                                         | 0.030 | 0.555 | 0.512 | 0.527 | 0.643 |
| Human cytomegalovirus infection                 | 0.030 | 0.108 | 0.113 | 0.111 | 0.092 |
| Influenza A                                     | 0.032 | 0.214 | 0.273 | 0.236 | 0.208 |
| Kaposi sarcoma-associated herpesvirus infection | 0.032 | 1.288 | 1.350 | 1.368 | 1.027 |
| Herpes simplex virus 1 infection                | 0.033 | 0.950 | 0.961 | 1.010 | 0.881 |
| Epstein-Barr virus infection                    | 0.034 | 0.000 | 0.000 | 0.001 | 0.000 |
| Human immunodeficiency virus 1 infection        | 0.034 | 0.000 | 0.000 | 0.000 | 0.000 |
| Chemical carcinogenesis                         | 0.035 | 0.000 | 0.000 | 0.001 | 0.000 |
| Colorectal cancer                               | 0.035 | 0.000 | 0.000 | 0.000 | 0.000 |
| Renal cell carcinoma                            | 0.037 | 0.053 | 0.055 | 0.059 | 0.045 |
| Bladder cancer                                  | 0.039 | 0.394 | 0.323 | 0.342 | 0.512 |
| Small cell lung cancer                          | 0.039 | 0.000 | 0.000 | 0.000 | 0.000 |
| Hepatocellular carcinoma                        | 0.047 | 0.088 | 0.111 | 0.089 | 0.101 |
| Viral myocarditis                               | 0.049 | 0.153 | 0.132 | 0.127 | 0.156 |
